# Supplementary material for: Nutrition and lifestyle intervention in type 2 diabetes: pilot study in the Netherlands showing improved glucose control and reduction in glucose lowering medication
Source: PubMed Central journal article supplement — BMJ Nutr Prev Health. 2019 May 14;2(1):43–50. doi: 10.1136/bmjnph-2018-000012 (PMC7678479; doi:10.1136/bmjnph-2018-000012), 2019-05-14
Supplement: bmjnph-2018-000012supp001.pdf [file bmjnph-2018-000012supp001.pdf]

1 **Supplementary Tables**

## 2 Supplementary Table 1. Change in prescription of medication class between baseline and at 6 months (n=72).

|                                                    | N  | %   | HbA1c <53 at follow-up<br>N=43 (60%)<br>N (%) | Baseline HbA1c Mean (SD) | 6 months HbA1c Mean (SD) | Statistical significance<br>P value |
|----------------------------------------------------|----|-----|-----------------------------------------------|--------------------------|--------------------------|-------------------------------------|
| Increase                                           | 1  | 1%  | 1 (2%)                                        | NA                       | NA                       | NA                                  |
| No change                                          | 29 | 40% | 20 (47%)                                      | 58.8 (13.4)              | 54.9 (15.1)              | <0.001                              |
| No medications prescribed before and after         | 7  | 10% | 6 (14%)                                       | 50.1 (4.6)               | 45.0 (7.6)               | 0.011                               |
| Decrease                                           | 35 | 49% | 22 (51%)                                      | 57.5 (10.5)              | 51.2 (9.3)               | <0.001                              |
| <i>Of whom complete elimination of medications</i> | 9  | 13% | 7 (16%)                                       | 55.6 (7.1)               | 47.1 (7.6)               | 0.001                               |

3
